# Supplementary material for: Accelerated Adaptive Evolution on a Newly Formed X Chromosome
Source: PubMed Central journal article supplement (PMC2672600; doi:10.1371/journal.pbio.1000082), 2009-04-14

**X**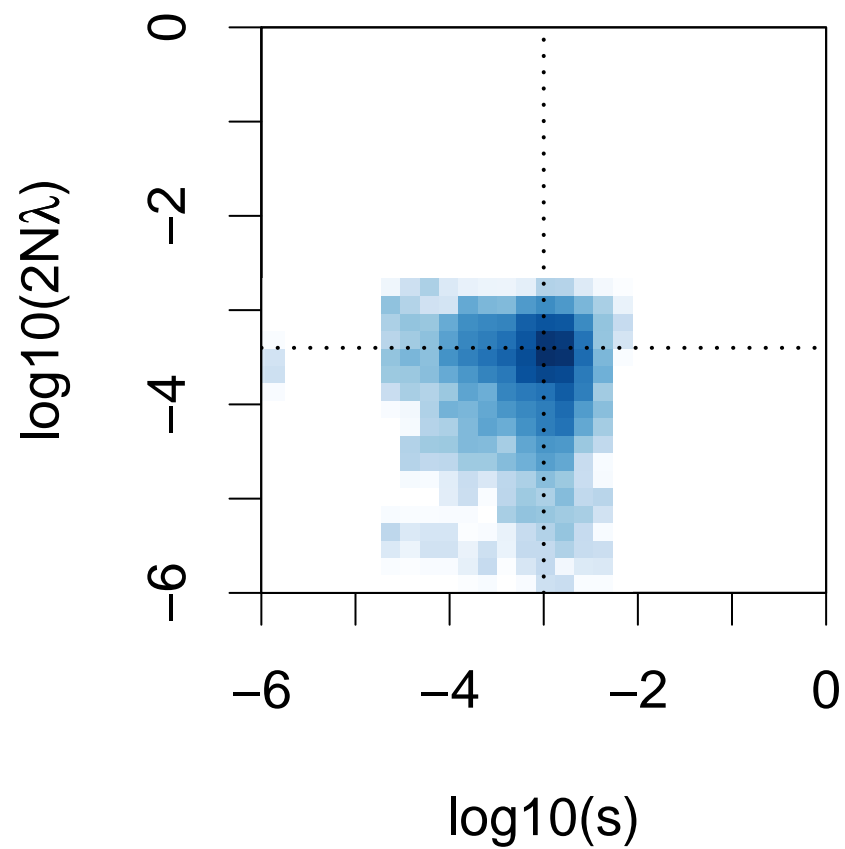**neo-X**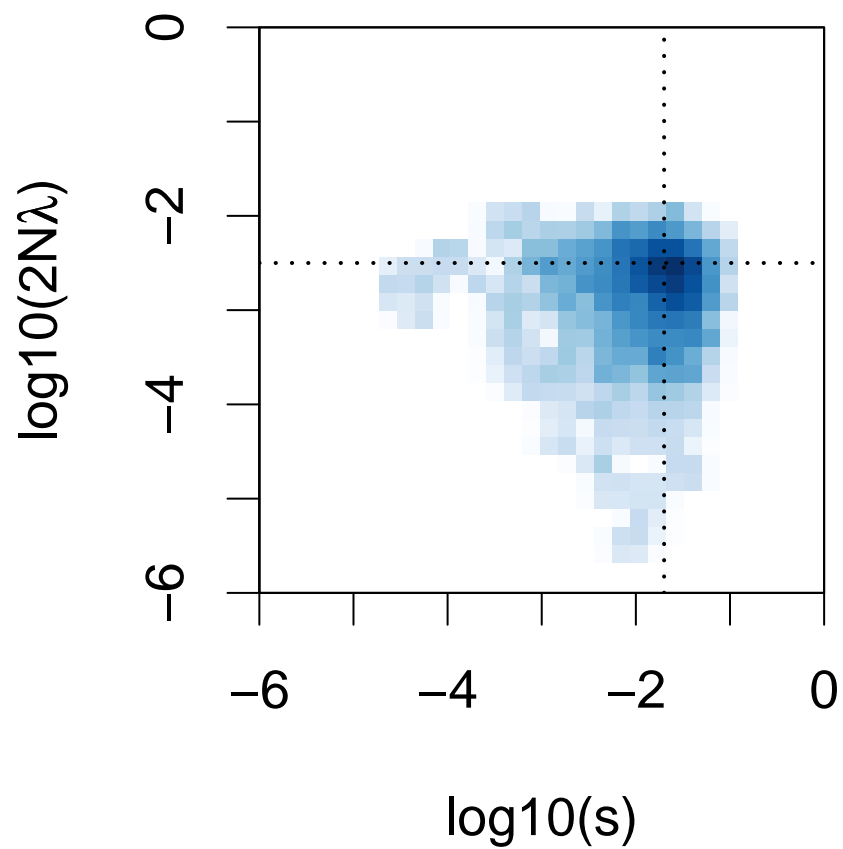**strength of selection**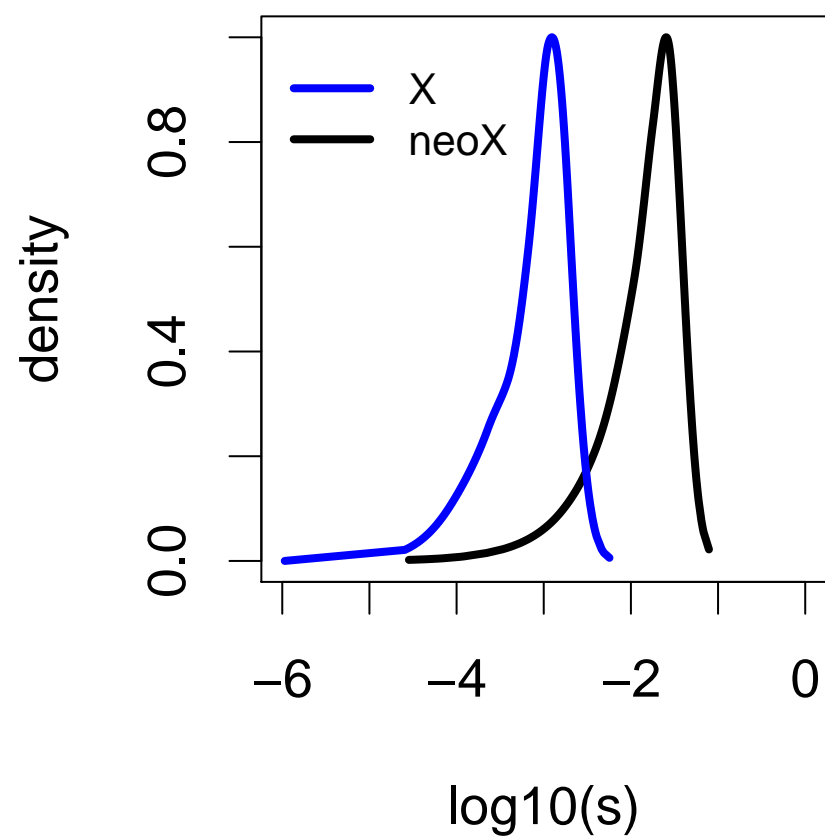**rate of sweeps**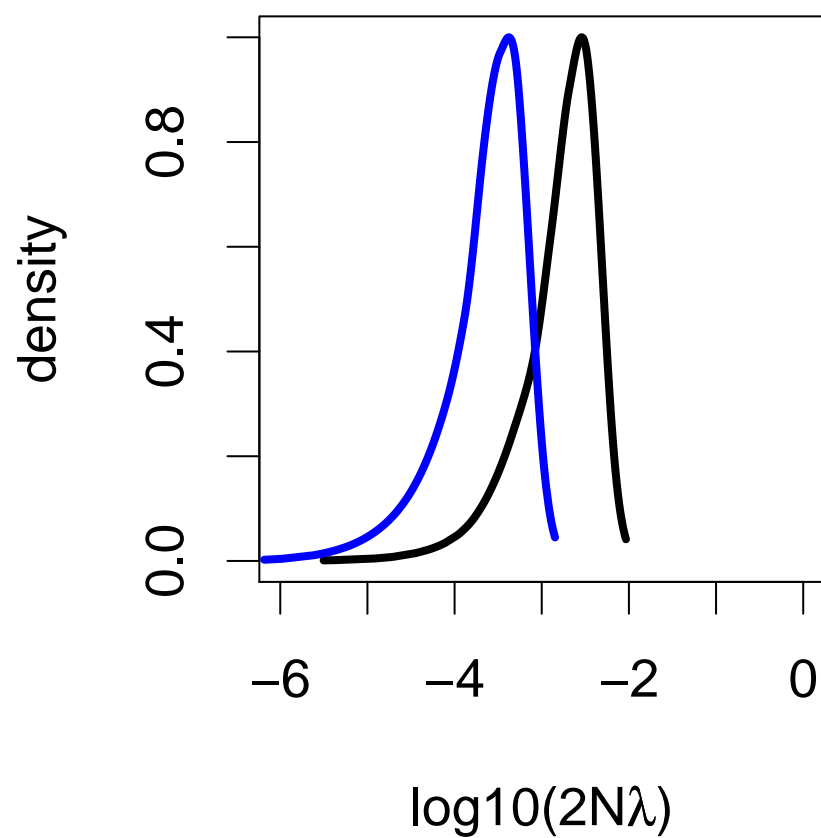

Supplement: pbio.1000082.sg001.pdf [file pbio.1000082.sg001.pdf]
